# Supplementary material
Source: MDPI journal article supplement (https://www.mdpi.com/1999-4907/14/6/1124)
Supplement: s1 [file s1]

# **Long-term simulated nitrogen deposition has moderate impacts on soil microbial communities across three bioclimatic domains of the eastern Canadian forest**

Authors: Marie Renaudin<sup>1,2,†</sup>, Rim Khelifa<sup>2,3,†</sup>, Simon Legault<sup>4</sup>, Steven W. Kembel<sup>2</sup>, Daniel Kneeshaw<sup>2,3</sup>, Jean-David Moore<sup>5</sup>, Daniel Houle<sup>1,2,3,\*</sup>

<sup>1</sup>Science and Technology Branch, Environment and Climate Change Canada, 105 McGill St., QC, H2Y 2E7 Montreal, Canada.

<sup>2</sup>Université du Québec à Montréal, Département des sciences biologiques, Montréal, QC H2X 1Y4, Canada.

<sup>3</sup>Centre d'Étude de la Forêt, Université du Québec à Montréal, Montréal, QC H2X 1Y4, Canada.

<sup>4</sup>Institut de Recherche en Biologie Végétale, Université de Montréal, Montréal, QC H1X 2B2, Canada.

<sup>5</sup>Direction de la recherche forestière, Forêt Québec, Ministère des Forêts, de la Faune et des Parcs, Québec City, QC G1P 3W8, Canada.

† These authors contributed equally to this work.

\* Corresponding author: Daniel Houle; [daniel.houle@ec.gc.ca](mailto:daniel.houle@ec.gc.ca).

## **Supplementary information**

**Table S1:** Environmental characteristics of the experimental sites selected for this study (from Ste-Marie and Houle, 2006).

|                                                      | Sugar maple site<br>(Lac Clair)                          | Balsam fir site<br>(Lac Laflamme) | Black spruce site<br>(Lac Tirasse) |
|------------------------------------------------------|----------------------------------------------------------|-----------------------------------|------------------------------------|
| <b>General characteristics</b>                       |                                                          |                                   |                                    |
| GPS coordinates                                      | 46°57'N 71°40'W                                          | 47°17'N 71°14'W                   | 49°12'N 73°29'W                    |
| Elevation (m)                                        | 270-390                                                  | 800                               | 400                                |
| Mean annual temperature (°C)                         | 3.4                                                      | -0.6                              | 0                                  |
| Mean annual precipitation (mm)                       | 1210                                                     | 1133                              | 823                                |
| N deposition (kg ha <sup>-1</sup> yr <sup>-1</sup> ) | 8.5                                                      | 5.7                               | 3.0                                |
| <b>Vegetation</b>                                    |                                                          |                                   |                                    |
| Bioclimatic domain                                   | Sugar maple – yellow birch                               | Balsam fir – white birch          | Black spruce – moss                |
| Dominant tree species                                | <i>Acer saccharum</i>                                    | <i>Abies balsamea</i>             | <i>Picea mariana</i>               |
| Associated vegetation                                | <i>Betula alleghaniensis</i><br><i>Fagus grandifolia</i> | Moss                              | Moss                               |
| Forest origin                                        | Partial cutting                                          | Clear cut                         | Forest fire                        |
| Forest age (yr)                                      | >130                                                     | 70                                | 70                                 |
| Forest cover (%)                                     | 97                                                       | 100                               | 95                                 |
| <b>F-H horizons properties</b>                       |                                                          |                                   |                                    |
| Humus type                                           | Mor-moder                                                | Mor                               | Mor                                |
| Layer depth (cm)                                     | 12                                                       | 7                                 | 6                                  |
| Rooting depth (m)                                    | 0.6                                                      | 0.6                               | 0.3                                |
| pH                                                   | 3.72                                                     | 4.08                              | 2.88                               |
| Mean annual temperature (°C)                         | 5.0                                                      | 3.6                               | 4.0                                |
| Water content (%)                                    | 75                                                       | 72                                | 74                                 |

**Table S2:** Results of one-way ANOVA and Kruskal-Wallis tests showing soil N concentration, C:N, and pH statistical differences between N addition treatments in F and H horizons at the sugar maple, balsam fir, and black spruce experimental sites. For all statistical tests, degrees of freedom are equal to two. Stars indicate statistically significant *p* values.

| <b>(a) Sugar maple site</b>  |                                                                                                                              |                                                                                                                              |                                                               |                                      |                                      |                                      |
|------------------------------|------------------------------------------------------------------------------------------------------------------------------|------------------------------------------------------------------------------------------------------------------------------|---------------------------------------------------------------|--------------------------------------|--------------------------------------|--------------------------------------|
|                              | <b>F horizon</b>                                                                                                             |                                                                                                                              |                                                               | <b>H horizon</b>                     |                                      |                                      |
|                              | <b>N</b>                                                                                                                     | <b>C:N</b>                                                                                                                   | <b>pH</b>                                                     | <b>N</b>                             | <b>C:N</b>                           | <b>pH</b>                            |
| <b>2013</b>                  | F = 0.35<br><i>p</i> = 0.7200                                                                                                | F = 1.64<br><i>p</i> = 0.2700                                                                                                | <b>Control &gt; High N</b><br>F = 6.46<br><i>p</i> = 0.0367 * | $\chi^2 = 2.51$<br><i>p</i> = 0.2851 | $\chi^2 = 1.69$<br><i>p</i> = 0.4298 | F = 1.84<br><i>p</i> = 0.238         |
| <b>2021</b>                  | $\chi^2 = 2.49$<br><i>p</i> = 0.2881                                                                                         | F = 0.34<br><i>p</i> = 0.7230                                                                                                | F = 2.34<br><i>p</i> = 0.1770                                 | F = 0.66<br><i>p</i> = 0.5520        | $\chi^2 = 2.98$<br><i>p</i> = 0.2253 | F = 0.11<br><i>p</i> = 0.8970        |
| <b>(b) Balsam fir site</b>   |                                                                                                                              |                                                                                                                              |                                                               |                                      |                                      |                                      |
|                              | <b>F horizon</b>                                                                                                             |                                                                                                                              |                                                               | <b>H horizon</b>                     |                                      |                                      |
|                              | <b>N</b>                                                                                                                     | <b>C:N</b>                                                                                                                   | <b>pH</b>                                                     | <b>N</b>                             | <b>C:N</b>                           | <b>pH</b>                            |
| <b>2013</b>                  | <b>High N &gt; Control</b><br>F = 9.08<br><i>p</i> = 0.0217 *<br><b>High N &gt; Low N</b><br>F = 9.08<br><i>p</i> = 0.0262 * | <b>High N &lt; Control</b><br>F = 8.59<br><i>p</i> = 0.0242 *<br><b>High N &lt; Low N</b><br>F = 8.59<br><i>p</i> = 0.0297 * | F = 0.79<br><i>p</i> = 0.4940                                 | F = 1.12<br><i>p</i> = 0.3860        | F = 1.40<br><i>p</i> = 0.3160        | F = 0.63<br><i>p</i> = 0.5630        |
| <b>2021</b>                  | F = 2<br><i>p</i> = 0.2160                                                                                                   | F = 3.32<br><i>p</i> = 0.1070                                                                                                | F = 0.92<br><i>p</i> = 0.4470                                 | F = 0.50<br><i>p</i> = 0.6280        | F = 1.43<br><i>p</i> = 0.3090        | F = 0.27<br><i>p</i> = 0.7690        |
| <b>(c) Black spruce site</b> |                                                                                                                              |                                                                                                                              |                                                               |                                      |                                      |                                      |
|                              | <b>F horizon</b>                                                                                                             |                                                                                                                              |                                                               | <b>H horizon</b>                     |                                      |                                      |
|                              | <b>N</b>                                                                                                                     | <b>C:N</b>                                                                                                                   | <b>pH</b>                                                     | <b>N</b>                             | <b>C:N</b>                           | <b>pH</b>                            |
| <b>2013</b>                  | F = 0.16<br><i>p</i> = 0.8550                                                                                                | F = 0.35<br><i>p</i> = 0.7180                                                                                                | F = 0.02<br><i>p</i> = 0.9820                                 | F = 0.25<br><i>p</i> = 0.7900        | F = 0.53<br><i>p</i> = 0.6190        | $\chi^2 = 0.55$<br><i>p</i> = 0.7575 |
| <b>2021</b>                  | $\chi^2 = 1.48$<br><i>p</i> = 0.4772                                                                                         | F = 0.75<br><i>p</i> = 0.5180                                                                                                | F = 0.09<br><i>p</i> = 0.9140                                 | F = 1.51<br><i>p</i> = 0.3060        | F = 1.41<br><i>p</i> = 0.3280        | F = 0.01<br><i>p</i> = 0.9880        |

(a)

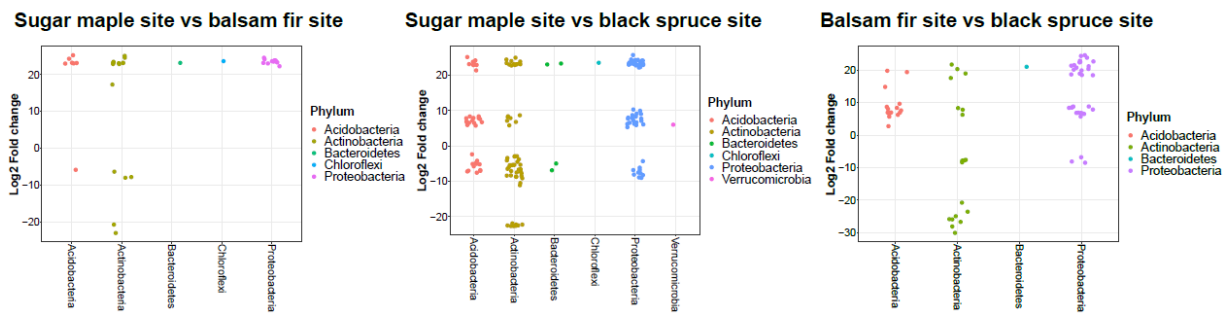

(b)

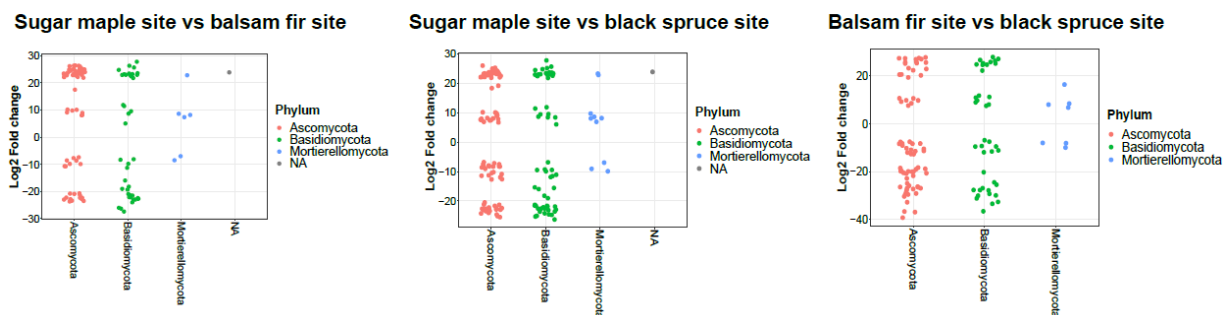

**Figure S1:** Soil bacterial (a) and fungal (b) ASVs differential abundance analysis between study sites in control plots. Points represent ASVs with abundance differing significantly ( $p < 0.05$ ) between treatments. Colors were assigned to phyla.

(a)

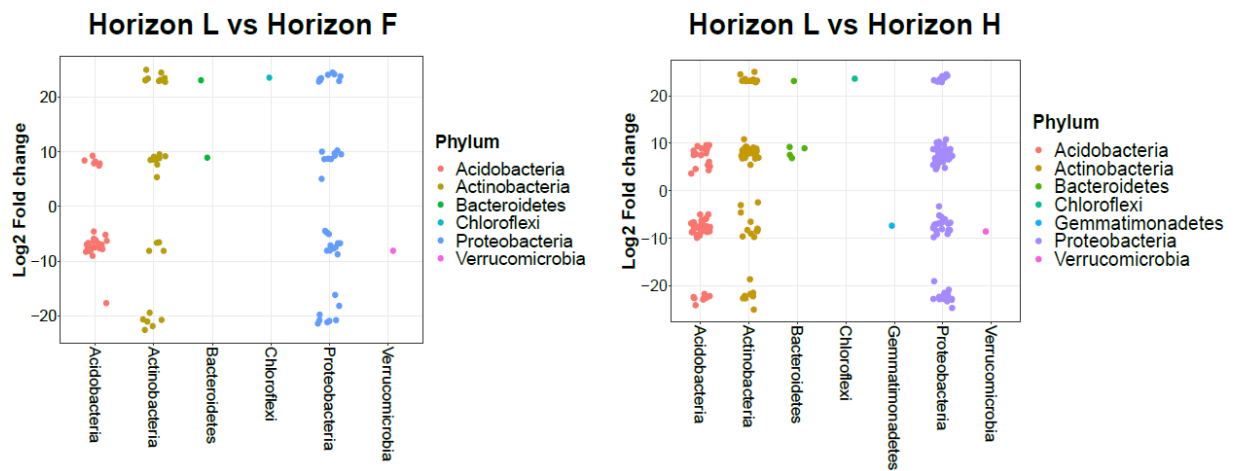

(b)

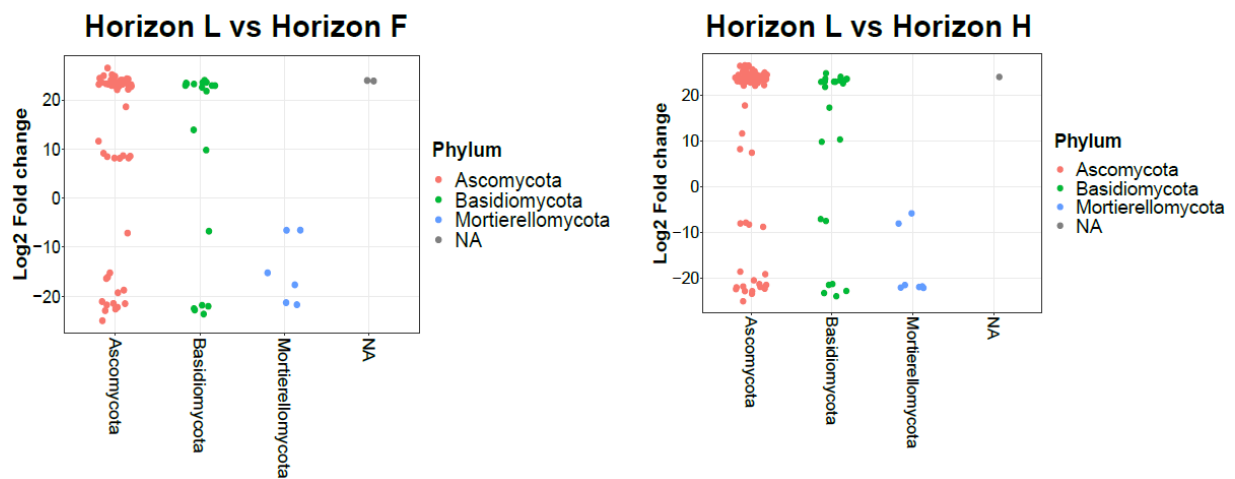

**Figure S2:** Soil bacterial (a) and fungal (b) ASVs differential abundance analysis between L, F, and H horizons in control plots at the sugar maple, the balsam fir, and the black spruce sites. Points represent ASVs with abundance differing significantly ( $p < 0.05$ ) between treatments. Colors were assigned to phyla.

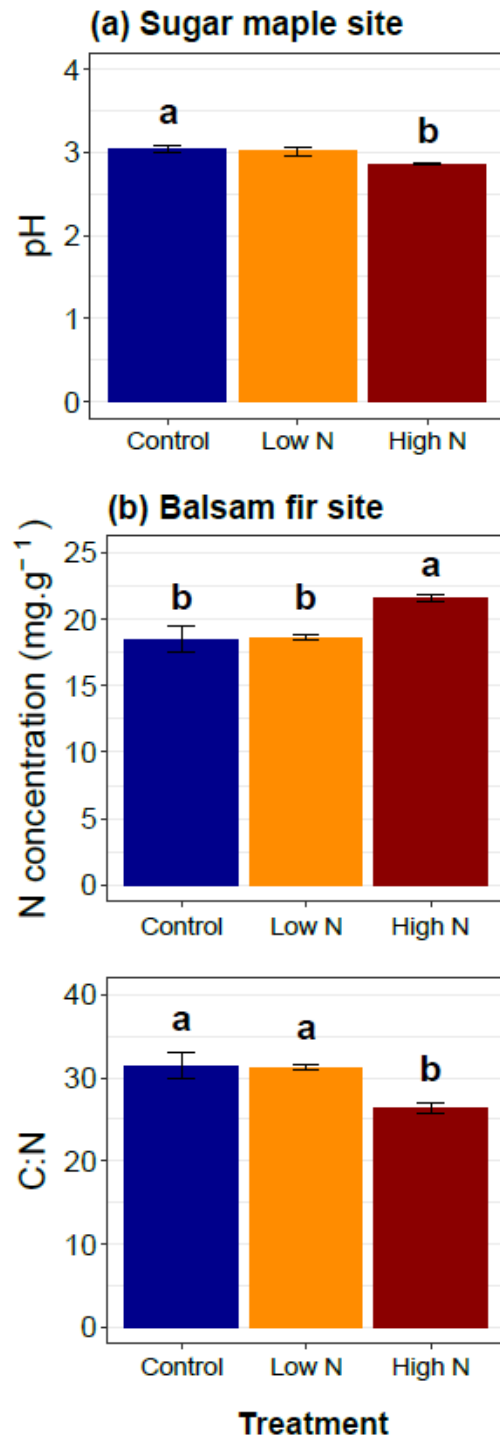

**Figure S3:** Soil pH (at the sugar maple site), N concentration, and C:N (at the balsam fir site) under control, low N, and high N treatments measured in the F horizon in 2013. Letters indicate statistical differences between treatments.
