# Supplementary material
Source: MDPI journal article supplement (https://www.mdpi.com/1999-4907/14/6/1124)
Supplement: s1 [file s1]

Archive with 4 entries (4 files):
- forests-2396806-supplementary.pdf
- Supplementary-File-1_Renaudin.txt
- Supplementary-File-2_Renaudin.txt
- Supplementary-File-3_Renaudin.txt
