# Supplementary material
Source: MDPI journal article supplement (https://www.mdpi.com/1999-4907/14/6/1124)
Supplement: s1 [file s1 › Supplementary-File-1_Renaudin.txt]

### R code for forest soil microbiome analyses ###
### Author: Marie Renaudin ###
### Update: 2022-10-17 ###


# Install and load required packages

#install.packages("vegan")
library(vegan)

#install.packages("devtools")
library(devtools)

#if (!require("BiocManager", quietly = TRUE))
#install.packages("BiocManager")
#BiocManager::install("phyloseq")
library(phyloseq)

#BiocManager::install("DESeq2")
library(DESeq2)

#install.packages("tidyr")
library(tidyr)

#install.packages("FSA")
library(FSA)

#install.packages("ggplot2")
library(ggplot2)

#install.packages("ggforce")
library(ggforce)


### I. BACTERIAL 16S rRNA ANALYSIS ###


## 1. Load data


# Load ASV table
ASVtranspo <- read.csv("C:/Users/Marie/Desktop/Postdoc UQAM/Data/ASVt_Table_16S_bis.csv", header = T, sep = "," , dec = "." , row.names=1) 
ASV16S_soil <- t(ASVtranspo)

dim(ASV16S_soil) # 86 samples (lines); 16,279 ASVs (columns)

ASV16S_soil <- ASV16S_soil[-28:-35,] # Remove controls from ASVs table

dim(ASV16S_soil) # 78 lines; 16,279 columns


# Load taxonomy table
Taxa16S_soil <- read.csv("C:/Users/Marie/Desktop/Postdoc UQAM/Data/Taxa_Table_16S_bis.csv", header = T, sep = "," , dec = "." , row.names=1)

dim(Taxa16S_soil) # 16,279 ASVs (lines); 6 taxa levels (columns)


# Load metadata
Data_soil <- read.table("C:/Users/Marie/Desktop/Postdoc UQAM/Data/META_DATA_16S_ITS.txt", header = T, row.names=1)

dim(Data_soil) # 78 samples (lines); 4 variables (columns)


## 2. Clean data 


# Removing sample C01NL16 (outlier)
Data_soil <- Data_soil[-3,]
ASV16S_soil <- ASV16S_soil[-3,]

dim(Data_soil) # 77 samples
dim(ASV16S_soil) # 77 samples


# Removing Eukaryotic and chloroplastic sequences
Taxa16S_soil_clean <- as.data.frame(Taxa16S_soil)

Taxa16S_soil_clean <- Taxa16S_soil_clean[-c(which(Taxa16S_soil_clean$Kingdom=="Eukaryota")),]

Taxa16S_soil_clean <- Taxa16S_soil_clean[-c(which(Taxa16S_soil_clean$Order=="Chloroplast")),]

dim(Taxa16S_soil) # 16,279 ASVs
dim(Taxa16S_soil_clean) # 16,275 ASVs

both<-intersect(colnames(ASV16S_soil),row.names(Taxa16S_soil_clean)); length(both)
ASV16S_soil_clean <- ASV16S_soil[,both]; dim(ASV16S_soil_clean) # Creation of a new cleaned ASVs matrix

colnames(ASV16S_soil_clean)==row.names(Taxa16S_soil_clean) # Verification of the new matrix


# Removing singletons
is1 <- colSums(ASV16S_soil_clean) <= 1
ASV16S_soil_clean.no1 <- ASV16S_soil_clean[,!is1]

dim(ASV16S_soil_clean)
dim(ASV16S_soil_clean.no1) # 13,174 final ASVs

both<-intersect(colnames(ASV16S_soil_clean.no1),row.names(Taxa16S_soil_clean)); length(both)
Taxa16S_soil_clean.no1 <- Taxa16S_soil_clean[both,]; dim(Taxa16S_soil_clean.no1) # Creation of a new cleaned ASVs matrix

colnames(ASV16S_soil_clean.no1)==row.names(Taxa16S_soil_clean.no1) # Verification of the new matrix


# Set sampling site, month and moss species as factors
Data_soil$Site <- as.factor(Data_soil$Site)
Data_soil$Treatment <- as.factor(Data_soil$Treatment)
Data_soil$Layer <- as.factor(Data_soil$Layer)


# Order layers
Data_soil$Layer<- factor(Data_soil$Layer, levels=c("L", "F", "H"))


# Order treatments
Data_soil$Treatment<- factor(Data_soil$Treatment, levels=c("Control", "LowN", "HighN"))


# Verify the correspondence between the dataset, ASVs table, and taxa table
row.names (ASV16S_soil_clean.no1)==row.names(Data_soil) # TRUE

colnames (ASV16S_soil_clean.no1)==row.names(Taxa16S_soil_clean.no1) # TRUE


## 3. Rarefaction


# Create a phyloseq object
Phylo16S <- phyloseq(otu_table(ASV16S_soil_clean.no1, taxa_are_rows=FALSE), 
                     sample_data(Data_soil), tax_table(as.matrix(Taxa16S_soil_clean.no1))) # Construct a phyloseq object

sum(sample_sums(Phylo16S)) # Total 2,242,773 sequences.

min(sample_sums(Phylo16S)) # Minimum sample sequencing depth in the data = 13,502 reads

rarefied.Phylo16S = rarefy_even_depth(Phylo16S, rngseed=1, sample.size=min(sample_sums(Phylo16S)), replace=F) # Rarefaction to 13,502 reads per sample

sum(sample_sums(rarefied.Phylo16S)) # Total 1,039,654 sequences.


# Extract abundance matrix from the phyloseq object
rarefied.ASV.16S = as(otu_table(rarefied.Phylo16S), "matrix")


# Coerce to data.frame
rarefied.ASV.16S = as.data.frame(rarefied.ASV.16S)


# Creation of a new rarefied data ASVs matrix
both<-intersect(colnames(rarefied.ASV.16S),row.names(Taxa16S_soil_clean.no1)); length(both)
rarefied.Taxa.16S <- Taxa16S_soil_clean.no1[both,]

dim(rarefied.Taxa.16S) # 12,492 ASVs

colnames(rarefied.ASV.16S)==row.names(rarefied.Taxa.16S) # Verification of the new matrix


## 4. Examine bacterial genera relative abundance


# Create matrix at the genus level
comm.taxoGenera <- aggregate(t(otu_table(rarefied.ASV.16S, taxa_are_rows = F)), by=list(class=rarefied.Taxa.16S$Genus), sum)
rownames(comm.taxoGenera) <- comm.taxoGenera[,1]
comm.taxoGenera <- comm.taxoGenera[,-1]
t(comm.taxoGenera)->comm.taxoGenera
colnames(comm.taxoGenera)

dim(comm.taxoGenera) # Total of 358 genera.


# Calculate relative abundance at the genus level
rel_abun_genus<-sweep(t(comm.taxoGenera), 2, apply(t(comm.taxoGenera),2,sum), `/`)
apply(rel_abun_genus,2,sum) # Confirming that all samples have a total relative abundance of 1.
t<-length(apply(rel_abun_genus,1,sum))
order(apply(rel_abun_genus,1,sum))[(t-19):t]
top20_genus<-names(apply(rel_abun_genus,1,sum)[order(apply(rel_abun_genus,1,sum))[(t-19):t]]);top20_genus
rel_abun_genus[top20_genus,]->rel_abun_genus
rel_abun_genus<-t(rel_abun_genus)


# Combine the environmental dataset and relative abundance of the 20 most abundant genera
dim(Data_soil);dim(rel_abun_genus)
cbind(Data_soil,rel_abun_genus)->metadataASV16S_soilgenus
summary(metadataASV16S_soilgenus)


# Order layers
metadataASV16S_soilgenus$Layer<- factor(metadataASV16S_soilgenus$Layer, levels=c("L", "F", "H"))


# Order treatments
metadataASV16S_soilgenus$Treatment<- factor(metadataASV16S_soilgenus$Treatment, levels=c("Control", "LowN", "HighN"))


# Create data frames per soil horizon and site

# Controls only - FIGURE 1
metadataASV16S_soilgenus_controls<- metadataASV16S_soilgenus[which((metadataASV16S_soilgenus$Treatment)=="Control"),]
dim(metadataASV16S_soilgenus_controls) # 27 samples.

Barplot_Clair<- metadataASV16S_soilgenus_controls[which((metadataASV16S_soilgenus_controls$Site)=="Lac_Clair"),]
Barplot_Laf<- metadataASV16S_soilgenus_controls[which((metadataASV16S_soilgenus_controls$Site)=="Lac_Laflamme"),]
Barplot_Tir<- metadataASV16S_soilgenus_controls[which((metadataASV16S_soilgenus_controls$Site)=="Lac_Tirasse"),]


# All data - FIGURE 2
dim(metadataASV16S_soilgenus) # 77 samples.

Barplot_Clair<- metadataASV16S_soilgenus[which((metadataASV16S_soilgenus$Site)=="Lac_Clair"),]
Barplot_Laf<- metadataASV16S_soilgenus[which((metadataASV16S_soilgenus$Site)=="Lac_Laflamme"),]
Barplot_Tir<- metadataASV16S_soilgenus[which((metadataASV16S_soilgenus$Site)=="Lac_Tirasse"),]


# Create aggregated dataset for barchart figure
data_long <- gather(Barplot_Laf, class, relative_abundance, "Gemmatirosa":"Acidothermus", factor_key=TRUE)
summary(data_long)
agg <- aggregate(data_long$relative_abundance, by=list(class=data_long$class,stand=data_long$Treatment), mean)
1-aggregate(agg$x,by=list(agg$stand),sum)$x 
agg$stand <- as.factor(agg$stand)

others<-matrix(NA,3,3);others # Change the 2nd number by dim(stand).
others[,1]<-"Other"
others[,2]<-levels(agg$stand);others
others[,3]<-1-aggregate(agg$x,by=list(agg$stand),sum)$x
others<-as.data.frame(others)
colnames(others)<-colnames(agg)
agg<-rbind(agg,others)
agg$x<-as.numeric(agg$x)
agg$class<-factor(agg$class, levels=levels(agg$class)[c(21,1:20)])
ASV16S_soil_genus_agg<-agg


# Plotting genera relative abundance
ASV16S_soil_genus_barchart<-ggplot(ASV16S_soil_genus_agg,aes(stand,x*100,fill=class))+
  geom_bar(stat="identity",alpha=0.9, width=0.9)+
  xlab("")+
  ylab("Relative abundance (%)")+
  ggtitle("")+
  theme_bw() + theme(legend.title = element_text(colour="black", size=22, face="bold"),
                     legend.text = element_text(colour="black", size = 12.5),
                     axis.text.x  = element_text(size=32, color="black"),
                     axis.text.y  = element_text(size=32, color="black"),
                     axis.title.x  = element_text(size=34, color="black"),
                     axis.title.y  = element_text(size=34, color="black"),
                     legend.position="bottom",
                     panel.background=element_rect(fill="white", colour="white"),
                     panel.grid.minor.y=element_blank(),
                     panel.grid.minor.x=element_blank(),
                     panel.grid.major.x = element_blank())+
  scale_fill_manual(name="",values=c('grey','#ff6600','#ff9900','#660000','#990000',
                                                     '#cc0000','#ff6666',"#660033","#990066","#cc3399","#330066",
                                                     '#663399','#9966cc','#cc99ff','#336666',
                                                     '#339999','#33cccc',"#006633","#339966","#66cc99","#669966"))

ASV16S_soil_genus_barchart # Export in pdf, A4 - portrait


# Test relative abundance significant differences
metadataASV16S_soilgenus_Clair<- metadataASV16S_soilgenus[which((metadataASV16S_soilgenus$Site)=="Lac_Clair"),]

metadataASV16S_soilgenus_Laflamme<- metadataASV16S_soilgenus[which((metadataASV16S_soilgenus$Site)=="Lac_Laflamme"),]

metadataASV16S_soilgenus_Tirasse<- metadataASV16S_soilgenus[which((metadataASV16S_soilgenus$Site)=="Lac_Tirasse"),]


kruskal.test(`Acidothermus`~ Treatment, data=metadataASV16S_soilgenus_Clair)
dunnTest(data=metadataASV16S_soilgenus_Clair,`Leptothrix`~ Treatment, method="bh")

kruskal.test(`Acidothermus`~ Treatment, data=metadataASV16S_soilgenus_Laflamme)
dunnTest(data=metadataASV16S_soilgenus_Laflamme,`Leptothrix`~ Treatment, method="bh")

kruskal.test(`Acidothermus`~ Treatment, data=metadataASV16S_soilgenus_Tirasse)
dunnTest(data=metadataASV16S_soilgenus_Tirasse,`Leptothrix`~ Treatment, method="bh")


metadataASV16S_soilgenus_Clair<- metadataASV16S_soilgenus_controls[which((metadataASV16S_soilgenus_controls$Site)=="Lac_Clair"),]

metadataASV16S_soilgenus_Laf<- metadataASV16S_soilgenus_controls[which((metadataASV16S_soilgenus_controls$Site)=="Lac_Laflamme"),]

metadataASV16S_soilgenus_Tir<- metadataASV16S_soilgenus_controls[which((metadataASV16S_soilgenus_controls$Site)=="Lac_Tirasse"),]

kruskal.test(`Acidibacter`~ Layer, data=metadataASV16S_soilgenus_Tir)
dunnTest(data=metadataASV16S_soilgenus_Clair,`Acidibacter`~ Layer, method="bh")


## 5. Examine alpha-diversity


# Calculate alpha-diversity on the rarefied data
alpha_diversity16S <- estimate_richness(otu_table(rarefied.Phylo16S, taxa_are_rows=FALSE),
                                        measure = c("Shannon", "Observed","Chao1"))

dim(alpha_diversity16S) # 77 samples.


# Add the calculated Shannon and Chao1 index in the dataset
Data_soil$shannon<-alpha_diversity16S$Shannon

Data_soil$chao1<-alpha_diversity16S$Chao1


# Controls only - FIGURE 3
Data_soil_controls<- Data_soil[which((Data_soil$Treatment)=="Control"),]
dim(Data_soil_controls) # 27 samples.


# Plotting alpha-diversity across sampling sites - FIGURE 3
PlotAlphadivSite<-ggplot(Data_soil_controls, aes(Layer, shannon, fill=Layer, color=Layer))+ 
  facet_wrap(~Site)+
  theme_bw()+
  geom_boxplot(alpha=0.9, lwd=1)+
  xlab("")+ylab("Shannon index")+
  theme(axis.text.x  = element_text (size=36, color="black"),
        axis.text.y  = element_text (size=36, color="black"),
        axis.title.x  = element_text(size=38, color="black"),
        axis.title.y  = element_text(size=38, color="black"),        
        panel.grid.minor.x=element_blank(),
        panel.grid.major.x = element_blank())+
  scale_fill_manual(name="Site",values=c( "#66CC00", "#CCCC66", "#996600"))+
  scale_color_manual(name="Site",values=c("black","black","black"))+
  annotate("text", x = 1, y = 5.3, label = "", size=13) +
  annotate("text", x = 2, y = 5.3, label = "", size=13) +
  annotate("text", x = 3, y = 5.3, label = "", size=13) +
  guides(fill=F,color=F);PlotAlphadivSite


# Plotting alpha-diversity across sampling sites - FIGURE 4
PlotAlphadivTreatment<-ggplot(Data_soil, aes(Treatment, shannon, fill=Treatment, color=Treatment))+ 
  facet_wrap(~Site)+
  theme_bw()+
  geom_boxplot(alpha=0.9, lwd=1)+
  xlab("")+ylab("Shannon index")+
  theme(axis.text.x  = element_text (size=24, color="black"),
        axis.text.y  = element_text (size=36, color="black"),
        axis.title.x  = element_text(size=38, color="black"),
        axis.title.y  = element_text(size=38, color="black"),        
        panel.grid.minor.x=element_blank(),
        panel.grid.major.x = element_blank())+
  scale_fill_manual(name="Site",values=c( "#FFCC99", "#FFCC33", "#FF3300"))+
  scale_color_manual(name="Site",values=c("black","black","black"))+
  annotate("text", x = 1, y = 6.5, label = "", size=13) +
  annotate("text", x = 2, y = 6.5, label = "", size=13) +
  annotate("text", x = 3, y = 6.5, label = "", size=13) +
  guides(fill=F,color=F);PlotAlphadivTreatment


# Test alpha-diversity significant differences between sampling sites

# Test normality
shapiro.test(Data_soil_controls$shannon) # Non normal
shapiro.test(Data_soil$shannon) # Non normal


# Kruskal-Wallis and Dunn post-hoc tests

## FIGURE 3
kruskal.test(shannon ~ Site, data=Data_soil_controls) # Not significant
kruskal.test(shannon ~ Layer, data=Data_soil_controls) # Significant


Data_soil_controls_clair <- Data_soil_controls[which((Data_soil_controls$Site)=="Lac_Clair"),]
kruskal.test(shannon ~ Layer, data=Data_soil_controls_clair) # Not significant


Data_soil_controls_laflamme <- Data_soil_controls[which((Data_soil_controls$Site)=="Lac_Laflamme"),]
kruskal.test(shannon ~ Layer, data=Data_soil_controls_laflamme)
dunnTest(data=Data_soil_controls_laflamme, shannon ~ Layer, method="bh") # L-H; chi=7.2, p=0.02


Data_soil_controls_tirasse <- Data_soil_controls[which((Data_soil_controls$Site)=="Lac_Tirasse"),]
kruskal.test(shannon ~ Layer, data=Data_soil_controls_tirasse) # Not significant


Data_soil_controls_litter <- Data_soil_controls[which((Data_soil_controls$Layer)=="L"),]
kruskal.test(shannon ~ Site, data=Data_soil_controls_litter) # Significant; Laf-Tir chi=6.49 p=0.03
dunnTest(data=Data_soil_controls_litter, shannon ~ Site, method="bh") 


Data_soil_controls_F <- Data_soil_controls[which((Data_soil_controls$Layer)=="F"),]
kruskal.test(shannon ~ Site, data=Data_soil_controls_F) # Not significant

Data_soil_controls_H <- Data_soil_controls[which((Data_soil_controls$Layer)=="H"),]
kruskal.test(shannon ~ Site, data=Data_soil_controls_H) # Not significant


## FIGURE 4
kruskal.test(shannon ~ Treatment, data=Data_soil) # Not significant


## 6. NMDS


# Make community matrix - extract columns with abundance information
com16S = metadataASV16S_soilgenus[,5:ncol(metadataASV16S_soilgenus)]


# Turn abundance data frame into a matrix
m_com16S = as.matrix(com16S)

NMDS16S = metaMDS(m_com16S, distance = "bray")
NMDS16S # stress = 0.081


# Extract NMDS scores (x and y coordinates) for sites
data.scores16S = as.data.frame(scores(NMDS16S)$site)


# Add columns to data frame
data.scores16S$Site = metadataASV16S_soilgenus$Site
data.scores16S$Treatment = metadataASV16S_soilgenus$Treatment
data.scores16S$Layer = metadataASV16S_soilgenus$Layer

head(data.scores16S)


# Plot NMDS - FIGURE 5
plotNMDS16SLayer = ggplot(data.scores16S, aes(x = NMDS1, y = NMDS2, color= Layer, fill=Layer))+ 
  geom_point(size = 4, aes(shape = Site, colour = Layer))+ 
  stat_ellipse(geom="polygon", aes(group=interaction(Layer, Site)), alpha=0.15, level=0.95)+
  theme_bw() + theme(legend.title = element_text(colour="black", size=18, face="bold"),
                     legend.text= element_text(colour="black", size=18),
                     axis.title= element_text(colour="black", face="bold",size="18"),
                     axis.text.x= element_text(colour="black", size=17) ,
                     axis.text.y= element_text(colour="black", size=17),
                     legend.background = element_blank(),
                     panel.grid.minor=element_blank(),
                     plot.title=element_blank())+
  labs(x = "NMDS1", colour = "Soil horizon", y = "NMDS2", shape = "Site")+ 
  scale_colour_manual(values = c("#66CC00", "#CCCC66", "#996600"))+
  scale_fill_manual(values = c("#66CC00", "#CCCC66", "#996600"))

plotNMDS16SLayer


plotNMDS16STreatment = ggplot(data.scores16S, aes(x= NMDS1, y= NMDS2, color= Treatment, fill= Treatment))+ 
  geom_point(size = 4, aes(shape = Site, colour = Treatment))+ 
  stat_ellipse(geom="polygon", aes(group=interaction(Treatment,Site)), alpha=0.15, level=0.95)+
  theme_bw() + theme(legend.title = element_text(colour="black", size=18, face="bold"),
                     legend.text= element_text(colour="black", size=18),
                     axis.title= element_text(colour="black", face="bold",size="18"),
                     axis.text.x= element_text(colour="black", size=17) ,
                     axis.text.y= element_text(colour="black", size=17),
                     legend.background = element_blank(),
                     panel.grid.minor=element_blank(),
                     plot.title=element_blank())+
  labs(x = "NMDS1", colour = "Treatment", y = "NMDS2", shape = "Site")+ 
  scale_colour_manual(values = c("#FFCC99", "#FFCC33", "#FF3300"))+
  scale_fill_manual(values = c("#FFCC99", "#FFCC33", "#FF3300"))

plotNMDS16STreatment


## 7. ASVs differential abundance testing


# Transform phyloseq into a DESeq object
sample_data(Phylo16S)$Layer <- as.factor(sample_data(Phylo16S)$Layer)

Deseq16S = phyloseq_to_deseq2(Phylo16S, ~ Layer)


# Deal with the zeros in the DESeq dataset
cts <- counts(Deseq16S)
geoMeans <- apply(cts, 1, function(row) if (all(row == 0)) 0 else exp(mean(log(row[row != 0]))))
Deseq16S <- estimateSizeFactors(Deseq16S, geoMeans=geoMeans)


# Run DESeq
Deseq16S = DESeq(Deseq16S)


# Filter the ASVs using a False Discovery Rate cutoff of 0.05
alpha = 0.05
res = results(Deseq16S, contrast=c("Layer", "L", "H"), alpha=alpha)
res = res[order(res$padj, na.last=NA), ]
res_sig = res[(res$padj < alpha), ]
res_sig

res_sig = cbind(as(res_sig, "data.frame"), as(tax_table(Phylo16S)[rownames(res_sig), ], "matrix"))


# Plot log2 fold change of the significant ASVs between conditions - FIGURE 6/7
plot <- ggplot(res_sig, aes(x=Phylum, y=log2FoldChange, color=Phylum)) +
  geom_jitter(size=3, width = 0.2) +
  theme_bw() + theme(legend.title = element_text(colour="black", size=26, face="bold"),
                     legend.text= element_text(colour="black", size=26),
                     axis.title= element_text(colour="black", face="bold",size="25"),
                     axis.text.x= element_text(angle = -90, hjust = 0, vjust=0.5, colour="black", size=22),
                     axis.text.y= element_text(colour="black", size=22),
                     legend.background = element_blank(),
                     panel.grid.minor=element_blank(),
                     plot.title=element_blank())+
  labs (x="", y="Log2 Fold change");  plot


# Difference between positive and negative ASVs
res_sig_asco <- res_sig[which((res_sig$Phylum)=="Actinobacteria"),]
res_sig_asco_positif <- res_sig_asco[which((res_sig_asco$log2FoldChange)>0),]
res_sig_asco_negatif <- res_sig_asco[which((res_sig_asco$log2FoldChange)<0),]

dim(res_sig_asco_positif) #81
dim(res_sig_asco_negatif) #70


## 8. PERMANOVA


# Convert Phyloseq object to a DESeq2 object
test.phyloseq.dds.16s<-phyloseq_to_deseq2(rarefied.Phylo16S,~Unit) # Set sampling unit as the experimental design formula.


# Create function for computation
gm_mean = function(x, na.rm=TRUE){
  exp(sum(log(x[x > 0]), na.rm=na.rm) / length(x))
}


# Estimate factor size
test.phyloseq.dds.16s = estimateSizeFactors(test.phyloseq.dds.16s, geoMeans = apply(counts(test.phyloseq.dds.16s), 1, gm_mean))


# Phyloseq variance stabilizing transformation with blind transformation
vst.blind.16s <- DESeq2::varianceStabilizingTransformation(test.phyloseq.dds.16s, blind=T)
vst.blind.Mat.16s <- SummarizedExperiment::assay(vst.blind.16s) # Extract transformed ASVs table.
vst.blind.Mat.16s<-t(vst.blind.Mat.16s)
vst.blind.Mat.16s[which(vst.blind.Mat.16s<0)]<-0


# Compute Bray-Curtis dissimilarities
comm.vst.blind.Mat.16s <- vegdist(vst.blind.Mat.16s, "bray")


# PERMANOVA
permanova_16S <- adonis2(comm.vst.blind.Mat.16s ~ Site + Layer + Treatment + 
                         Site:Layer + Site:Treatment + Layer:Treatment + Site:Layer:Treatment,
                        data=Data_soil, permutations = 999)


### II. FUNGAL ITS ANALYSIS ###


## 1. Load data


# Load ASV table
ASVtranspoITS <- read.csv("C:/Users/Marie/Desktop/Postdoc UQAM/Data/ASVt_Table_ITS_bis.csv", header = T, sep = "," , dec = "." , row.names=1) 
ASVITS_soil <- t(ASVtranspoITS)

dim(ASVITS_soil) # 87 samples (lines); 4,801 ASVs (columns)

ASVITS_soil <- ASVITS_soil[-28:-36,] # Remove controls from ASVs table

dim(ASVITS_soil) # 78 lines; 4,801 columns


# Load taxonomy table
TaxaITS_soil <- read.csv("C:/Users/Marie/Desktop/Postdoc UQAM/Data/Taxa_Table_ITS_bis.csv", header = T, sep = "," , dec = "." , row.names=1)

dim(TaxaITS_soil) # 4,801 ASVs (lines); 7 taxa levels (columns)


# Load metadata
Data_soil <- read.table("C:/Users/Marie/Desktop/Postdoc UQAM/Data/META_DATA_16S_ITS.txt", header = T, row.names=1)

dim(Data_soil) # 78 samples (lines); 4 variables (columns)


## 2. Clean data


# Removing sample C01NL16 (outlier)

Data_soil <- Data_soil[-3,]
ASVITS_soil <- ASVITS_soil[-3,]

dim(Data_soil) # 77 samples
dim(ASVITS_soil) # 77 samples


# Removing non-fungal sequences

TaxaITS_soil_clean <- as.data.frame(TaxaITS_soil)

TaxaITS_soil_clean <- TaxaITS_soil_clean[(which(TaxaITS_soil_clean$Kingdom=="k__Fungi")),]

dim(TaxaITS_soil) # 4,801 ASVs
dim(TaxaITS_soil_clean) # 4,797 ASVs

both<-intersect(colnames(ASVITS_soil),row.names(TaxaITS_soil_clean)); length(both)
ASVITS_soil_clean <- ASVITS_soil[,both]; dim(ASVITS_soil_clean) # Creation of a new cleaned ASVs matrix

colnames(ASVITS_soil_clean)==row.names(TaxaITS_soil_clean) # Verification of the new matrix


# Removing singletons

is1 <- colSums(ASVITS_soil_clean) <= 1
ASVITS_soil_clean.no1 <- ASVITS_soil_clean[,!is1]

dim(ASVITS_soil_clean)
dim(ASVITS_soil_clean.no1) # 4,667 final ASVs

both<-intersect(colnames(ASVITS_soil_clean.no1),row.names(TaxaITS_soil_clean)); length(both)
TaxaITS_soil_clean.no1 <- TaxaITS_soil_clean[both,]; dim(TaxaITS_soil_clean.no1) # Creation of a new cleaned ASVs matrix

colnames(ASVITS_soil_clean.no1)==row.names(TaxaITS_soil_clean.no1) # Verification of the new matrix


# Set sampling site, month and moss species as factors
Data_soil$Site <- as.factor(Data_soil$Site)
Data_soil$Treatment <- as.factor(Data_soil$Treatment)
Data_soil$Layer <- as.factor(Data_soil$Layer)


# Order layers
Data_soil$Layer<- factor(Data_soil$Layer, levels=c("L", "F", "H"))


# Order treatments
Data_soil$Treatment<- factor(Data_soil$Treatment, levels=c("Control", "LowN", "HighN"))


# Verify the correspondence between the dataset, ASVs table, and taxa table
row.names (ASVITS_soil_clean.no1)==row.names(Data_soil) # TRUE

colnames (ASVITS_soil_clean.no1)==row.names(TaxaITS_soil_clean.no1) # TRUE


## 3. Rarefaction


# Construct a phyloseq object
PhyloITS <- phyloseq(otu_table(ASVITS_soil_clean.no1, taxa_are_rows=FALSE), 
                     sample_data(Data_soil), tax_table(as.matrix(TaxaITS_soil_clean.no1))) # Construct a phyloseq object

sum(sample_sums(PhyloITS)) # Total 1,374,990 sequences

min(sample_sums(PhyloITS)) # Minimum sample sequencing depth in the data = 2,716 reads

rarefied.PhyloITS = rarefy_even_depth(PhyloITS, rngseed=1, sample.size=min(sample_sums(PhyloITS)), replace=F) # Rarefaction to 2,716 reads per sample

sum(sample_sums(rarefied.PhyloITS)) # Total 209,132 sequences


# Extract abundance matrix from the phyloseq object
rarefied.ASV.ITS = as(otu_table(rarefied.PhyloITS), "matrix")


# Coerce to data.frame
rarefied.ASV.ITS = as.data.frame(rarefied.ASV.ITS)


# Creation of a new rarefied ASVs matrix
both<-intersect(colnames(rarefied.ASV.ITS),row.names(TaxaITS_soil_clean.no1)); length(both)
rarefied.Taxa.ITS <- TaxaITS_soil_clean.no1[both,]

dim(rarefied.Taxa.ITS) # 3,960 ASVs

colnames(rarefied.ASV.ITS)==row.names(rarefied.Taxa.ITS) # Verification of the new matrix


## 4. Examine bacterial genera relative abundance


# Create matrix at the genus level
comm.taxoGenera <- aggregate(t(otu_table(rarefied.ASV.ITS, taxa_are_rows = F)), by=list(class=rarefied.Taxa.ITS$Genus), sum)
rownames(comm.taxoGenera) <- comm.taxoGenera[,1]
comm.taxoGenera <- comm.taxoGenera[,-1]
t(comm.taxoGenera)->comm.taxoGenera
colnames(comm.taxoGenera)

dim(comm.taxoGenera) # Total of 397 genera.


# Calculate relative abundance at the genus level
rel_abun_genus<-sweep(t(comm.taxoGenera), 2, apply(t(comm.taxoGenera),2,sum), `/`)
apply(rel_abun_genus,2,sum) # Confirming that all samples have a total relative abundance of 1.
t<-length(apply(rel_abun_genus,1,sum))
order(apply(rel_abun_genus,1,sum))[(t-19):t]
top20_genus<-names(apply(rel_abun_genus,1,sum)[order(apply(rel_abun_genus,1,sum))[(t-19):t]]);top20_genus
rel_abun_genus[top20_genus,]->rel_abun_genus
rel_abun_genus<-t(rel_abun_genus)


# Combine the environmental dataset and relative abundance of the 20 most abundant genera
dim(Data_soil);dim(rel_abun_genus)
cbind(Data_soil,rel_abun_genus)->metadataASVITS_soilgenus
summary(metadataASVITS_soilgenus)


# Order layers
metadataASVITS_soilgenus$Layer<- factor(metadataASVITS_soilgenus$Layer, levels=c("L", "F", "H"))


# Order treatments
metadataASVITS_soilgenus$Treatment<- factor(metadataASVITS_soilgenus$Treatment, levels=c("Control", "LowN", "HighN"))


# Create data frames per soil horizon and site

# Controls only - FIGURE 1
metadataASVITS_soilgenus_controls<- metadataASVITS_soilgenus[which((metadataASVITS_soilgenus$Treatment)=="Control"),]
dim(metadataASVITS_soilgenus_controls) # 27 samples.

Barplot_Clair<- metadataASVITS_soilgenus_controls[which((metadataASVITS_soilgenus_controls$Site)=="Lac_Clair"),]
Barplot_Laf<- metadataASVITS_soilgenus_controls[which((metadataASVITS_soilgenus_controls$Site)=="Lac_Laflamme"),]
Barplot_Tir<- metadataASVITS_soilgenus_controls[which((metadataASVITS_soilgenus_controls$Site)=="Lac_Tirasse"),]


# All data - FIGURE 2
dim(metadataASVITS_soilgenus) # 77 samples.

Barplot_Clair<- metadataASVITS_soilgenus[which((metadataASVITS_soilgenus$Site)=="Lac_Clair"),]
Barplot_Laf<- metadataASVITS_soilgenus[which((metadataASVITS_soilgenus$Site)=="Lac_Laflamme"),]
Barplot_Tir<- metadataASVITS_soilgenus[which((metadataASVITS_soilgenus$Site)=="Lac_Tirasse"),]


# Create aggregated dataset for barchart figure
data_long <- gather(Barplot_Tir, class, relative_abundance, "g__Cladophialophora":"g__Russula", factor_key=TRUE)
summary(data_long)
agg <- aggregate(data_long$relative_abundance, by=list(class=data_long$class,stand=data_long$Treatment), mean)
1-aggregate(agg$x,by=list(agg$stand),sum)$x 
agg$stand <- as.factor(agg$stand)

others<-matrix(NA,3,3);others # Change the 2nd number by dim(stand).
others[,1]<-"Other"
others[,2]<-levels(agg$stand);others
others[,3]<-1-aggregate(agg$x,by=list(agg$stand),sum)$x
others<-as.data.frame(others)
colnames(others)<-colnames(agg)
agg<-rbind(agg,others)
agg$x<-as.numeric(agg$x)
agg$class<-factor(agg$class, levels=levels(agg$class)[c(21,1:20)])
ASVITS_soil_genus_agg<-agg


# Plotting genera relative abundance
ASVITS_soil_genus_barchart<-ggplot(ASVITS_soil_genus_agg,aes(stand,x*100,fill=class))+
  geom_bar(stat="identity",alpha=0.9, width=0.9)+
  xlab("")+
  ylab("Relative abundance (%)")+
  ggtitle("")+
  theme_bw() + theme(legend.title = element_text(colour="black", size=22, face="bold"),
                     legend.text = element_text(colour="black", size = 10),
                     axis.text.x  = element_text(size=32, color="black"),
                     axis.text.y  = element_text(size=32, color="black"),
                     axis.title.x  = element_text(size=34, color="black"),
                     axis.title.y  = element_text(size=34, color="black"),
                     legend.position="bottom",
                     panel.background=element_rect(fill="white", colour="white"),
                     panel.grid.minor.y=element_blank(),
                     panel.grid.minor.x=element_blank(),
                     panel.grid.major.x = element_blank())+
  scale_fill_manual(name="",values=c('grey','#330033','#660033','#993366','#ffccff',
                                     '#ff9999','#c66666',"#cc0066","#ff33cc","#ff0099","#cc3333",
                                     '#ff0033','#cc0000','#cc6633','#ff6633',
                                     '#ff9966','#ffcc66',"#ffff66","#cc9900","#cccc00","#669933"))

ASVITS_soil_genus_barchart # Export in pdf, A4 - portrait


# Test relative abundance significant differences
metadataASVITS_soilgenus_Clair<- metadataASVITS_soilgenus[which((metadataASVITS_soilgenus$Site)=="Lac_Clair"),]

metadataASVITS_soilgenus_Laf<- metadataASVITS_soilgenus[which((metadataASVITS_soilgenus$Site)=="Lac_Laflamme"),]

metadataASVITS_soilgenus_Tir<- metadataASVITS_soilgenus[which((metadataASVITS_soilgenus$Site)=="Lac_Tirasse"),]


kruskal.test(`g__Tomentella`~ Treatment, data=metadataASVITS_soilgenus_Tir)
dunnTest(data=metadataASVITS_soilgenus_Tir,`g__Tomentella`~ Treatment, method="bh")


metadataASVITS_soilgenus_L<- metadataASVITS_soilgenus_controls[which((metadataASVITS_soilgenus_controls$Layer)=="L"),]

metadataASVITS_soilgenus_F<- metadataASVITS_soilgenus_controls[which((metadataASVITS_soilgenus_controls$Layer)=="F"),]

metadataASVITS_soilgenus_H<- metadataASVITS_soilgenus_controls[which((metadataASVITS_soilgenus_controls$Layer)=="H"),]


kruskal.test(`g__Archaeorhizomyces`~ Site, data=metadataASVITS_soilgenus_H)
dunnTest(data=metadataASVITS_soilgenus_F,`g__Archaeorhizomyces`~ Site, method="bh")


## 5. Examine alpha-diversity


# Calculate alpha-diversity on rarefied data
alpha_diversityITS <- estimate_richness(otu_table(rarefied.PhyloITS, taxa_are_rows=FALSE),
                                        measure = c("Shannon", "Observed","Chao1"))

dim(alpha_diversityITS) # 77 samples.


# Add the calculated Shannon and Chao1 index in the dataset
Data_soil$shannon<-alpha_diversityITS$Shannon

Data_soil$chao1<-alpha_diversityITS$Chao1


# Controls only - FIGURE 3
Data_soil_controls<- Data_soil[which((Data_soil$Treatment)=="Control"),]
dim(Data_soil_controls) # 27 samples.


# Plotting alpha-diversity across sampling sites - FIGURE 3
PlotAlphadivSite<-ggplot(Data_soil_controls, aes(Layer, shannon, fill=Layer, color=Layer))+ 
  facet_wrap(~Site)+
  theme_bw()+
  geom_boxplot(alpha=0.9, lwd=1)+
  xlab("")+ylab("Shannon index")+
  theme(axis.text.x  = element_text (size=36, color="black"),
        axis.text.y  = element_text (size=36, color="black"),
        axis.title.x  = element_text(size=38, color="black"),
        axis.title.y  = element_text(size=38, color="black"),        
        panel.grid.minor.x=element_blank(),
        panel.grid.major.x = element_blank())+
  scale_fill_manual(name="Site",values=c( "#66CC00", "#CCCC66", "#996600"))+
  scale_color_manual(name="Site",values=c("black","black","black"))+
  annotate("text", x = 1, y = 5, label = "", size=13) +
  annotate("text", x = 2, y = 5, label = "", size=13) +
  annotate("text", x = 3, y = 5, label = "", size=13) +
  guides(fill=F,color=F);PlotAlphadivSite


# Plotting alpha-diversity across sampling sites - FIGURE 4
PlotAlphadivTreatment<-ggplot(Data_soil, aes(Treatment, shannon, fill=Treatment, color=Treatment))+ 
  facet_wrap(~Site)+
  theme_bw()+
  geom_boxplot(alpha=0.9, lwd=1)+
  xlab("")+ylab("Shannon index")+
  theme(axis.text.x  = element_text (size=24, color="black"),
        axis.text.y  = element_text (size=36, color="black"),
        axis.title.x  = element_text(size=38, color="black"),
        axis.title.y  = element_text(size=38, color="black"),        
        panel.grid.minor.x=element_blank(),
        panel.grid.major.x = element_blank())+
  scale_fill_manual(name="Site",values=c( "#FFCC99", "#FFCC33", "#FF3300"))+
  scale_color_manual(name="Site",values=c("black","black","black"))+
  annotate("text", x = 1, y = 6, label = "", size=13) +
  annotate("text", x = 2, y = 6, label = "", size=13) +
  annotate("text", x = 3, y = 6, label = "", size=13) +
  guides(fill=F,color=F);PlotAlphadivTreatment


# Test alpha-diversity significant differences between sampling sites

# Test normality
shapiro.test(Data_soil_controls$shannon) # Normal
shapiro.test(Data_soil$shannon) # Non normal

# Kruskal-Wallis and Dunn post-hoc tests

## FIGURE 3
AOV<- aov(shannon ~ Site, data=Data_soil_controls) # Not significant
summary(AOV)

AOV<- aov(shannon ~ Layer, data=Data_soil_controls) # Significant
summary(AOV)


Data_soil_controls_clair <- Data_soil_controls[which((Data_soil_controls$Site)=="Lac_Clair"),]
AOV<- aov(shannon ~ Layer, data=Data_soil_controls_clair) # Significant
summary(AOV)
post_oc<-TukeyHSD(AOV, "Layer", ordered=T); post_oc


Data_soil_controls_laflamme <- Data_soil_controls[which((Data_soil_controls$Site)=="Lac_Laflamme"),]
AOV<- aov(shannon ~ Layer, data=Data_soil_controls_laflamme) # Significant
summary(AOV)
post_oc<-TukeyHSD(AOV, "Layer", ordered=T); post_oc


Data_soil_controls_tirasse <- Data_soil_controls[which((Data_soil_controls$Site)=="Lac_Tirasse"),]
AOV<- aov(shannon ~ Layer, data=Data_soil_controls_tirasse) # Not significant
summary(AOV)


Data_soil_controls_litter <- Data_soil_controls[which((Data_soil_controls$Layer)=="L"),]
AOV<- aov(shannon ~ Site, data=Data_soil_controls_litter) # Significant; Laf-Tir F=5.69 p=0.04
summary(AOV)
post_oc<-TukeyHSD(AOV, "Site", ordered=T); post_oc


Data_soil_controls_F <- Data_soil_controls[which((Data_soil_controls$Layer)=="F"),]
AOV<- aov(shannon ~ Site, data=Data_soil_controls_F) # Not significant
summary(AOV)

Data_soil_controls_H <- Data_soil_controls[which((Data_soil_controls$Layer)=="H"),]
AOV<- aov(shannon ~ Site, data=Data_soil_controls_H) # Not significant
summary(AOV)


## FIGURE 4
kruskal.test(shannon ~ Treatment, data=Data_soil) # Not significant


## 6. NMDS


# Make community matrix - extract columns with abundance information
comITS = metadataASVITS_soilgenus[,5:ncol(metadataASVITS_soilgenus)]


# Turn abundance data frame into a matrix
m_comITS = as.matrix(comITS)

NMDSITS = metaMDS(m_comITS, distance = "bray")
NMDSITS # stress = 0.17


# Extract NMDS scores (x and y coordinates) for sites
data.scoresITS = as.data.frame(scores(NMDSITS)$site)


# Add columns to data frame
data.scoresITS$Site = metadataASVITS_soilgenus$Site
data.scoresITS$Treatment = metadataASVITS_soilgenus$Treatment
data.scoresITS$Layer = metadataASVITS_soilgenus$Layer

head(data.scoresITS)


# Plot NMDS - FIGURE 5

plotNMDSITSLayer = ggplot(data.scoresITS, aes(x = NMDS1, y = NMDS2, color= Layer, fill=Layer))+ 
  geom_point(size = 4, aes(shape = Site, colour = Layer))+ 
  stat_ellipse(geom="polygon", aes(group=interaction(Layer, Site)), alpha=0.15, level=0.95)+
  theme_bw() + theme(legend.title = element_text(colour="black", size=18, face="bold"),
                     legend.text= element_text(colour="black", size=18),
                     axis.title= element_text(colour="black", face="bold",size="18"),
                     axis.text.x= element_text(colour="black", size=17) ,
                     axis.text.y= element_text(colour="black", size=17),
                     legend.background = element_blank(),
                     panel.grid.minor=element_blank(),
                     plot.title=element_blank())+
  labs(x = "NMDS1", colour = "Soil horizon", y = "NMDS2", shape = "Site")+ 
  scale_colour_manual(values = c("#66CC00", "#CCCC66", "#996600"))+
  scale_fill_manual(values = c("#66CC00", "#CCCC66", "#996600"))

plotNMDSITSLayer


plotNMDSITSTreatment = ggplot(data.scoresITS, aes(x= NMDS1, y= NMDS2, color= Treatment, fill= Treatment))+ 
  geom_point(size = 4, aes(shape = Site, colour = Treatment))+ 
  stat_ellipse(geom="polygon", aes(group=interaction(Treatment,Site)), alpha=0.15, level=0.95)+
  theme_bw() + theme(legend.title = element_text(colour="black", size=18, face="bold"),
                     legend.text= element_text(colour="black", size=18),
                     axis.title= element_text(colour="black", face="bold",size="18"),
                     axis.text.x= element_text(colour="black", size=17) ,
                     axis.text.y= element_text(colour="black", size=17),
                     legend.background = element_blank(),
                     panel.grid.minor=element_blank(),
                     plot.title=element_blank())+
  labs(x = "NMDS1", colour = "Treatment", y = "NMDS2", shape = "Site")+ 
  scale_colour_manual(values = c("#FFCC99", "#FFCC33", "#FF3300"))+
  scale_fill_manual(values = c("#FFCC99", "#FFCC33", "#FF3300"))

plotNMDSITSTreatment


## 7. ASVs differential abundance testing


# Transform phyloseq into a DESeq object
sample_data(PhyloITS)$Layer <- as.factor(sample_data(PhyloITS)$Layer)

DeseqITS = phyloseq_to_deseq2(PhyloITS, ~ Layer)


# Deal with the zeros in the DESeq dataset
cts <- counts(DeseqITS)
geoMeans <- apply(cts, 1, function(row) if (all(row == 0)) 0 else exp(mean(log(row[row != 0]))))
DeseqITS <- estimateSizeFactors(DeseqITS, geoMeans=geoMeans)


# Run DESeq
DeseqITS = DESeq(DeseqITS)


# Filter the ASVs using a False Discovery Rate cutoff of 0.05
alpha = 0.05
res = results(DeseqITS, contrast=c("Layer", "L", "H"), alpha=alpha)
res = res[order(res$padj, na.last=NA), ]
res_sig = res[(res$padj < alpha), ]
res_sig

res_sig = cbind(as(res_sig, "data.frame"), as(tax_table(PhyloITS)[rownames(res_sig), ], "matrix"))


# Plot log2 fold change of the significant ASVs between conditions -FIGURE 6/7
plot <- ggplot(res_sig, aes(x=Phylum, y=log2FoldChange, color=Phylum)) +
  geom_jitter(size=3, width = 0.2) +
  theme_bw() + theme(legend.title = element_text(colour="black", size=26, face="bold"),
                     legend.text= element_text(colour="black", size=26),
                     axis.title= element_text(colour="black", face="bold",size="25"),
                     axis.text.x= element_text(angle = -90, hjust = 0, vjust=0.5, colour="black", size=22),
                     axis.text.y= element_text(colour="black", size=22),
                     legend.background = element_blank(),
                     panel.grid.minor=element_blank(),
                     plot.title=element_blank())+
  labs (x="", y="Log2 Fold change");  plot


# Difference between positive and negative ASVs
res_sig_asco <- res_sig[which((res_sig$Phylum)=="p__Basidiomycota"),]
res_sig_asco_positif <- res_sig_asco[which((res_sig_asco$log2FoldChange)>0),]
res_sig_asco_negatif <- res_sig_asco[which((res_sig_asco$log2FoldChange)<0),]

dim(res_sig_asco_positif) #81
dim(res_sig_asco_negatif) #70


## 8. PERMANOVA


# Convert to a DESeq2 object
test.phyloseq.dds.ITS<-phyloseq_to_deseq2(rarefied.PhyloITS,~Unit) # Set sampling unit as the experimental design formula.


# Create function for computation
gm_mean = function(x, na.rm=TRUE){
  exp(sum(log(x[x > 0]), na.rm=na.rm) / length(x))
}


# Estimate factor size
test.phyloseq.dds.ITS = estimateSizeFactors(test.phyloseq.dds.ITS, geoMeans = apply(counts(test.phyloseq.dds.ITS), 1, gm_mean))


# Phyloseq variance stabilizing transformation with blind transformation
vst.blind.ITS <- DESeq2::varianceStabilizingTransformation(test.phyloseq.dds.ITS, blind=T)
vst.blind.Mat.ITS <- SummarizedExperiment::assay(vst.blind.ITS) # Extract transformed ASVs table.
vst.blind.Mat.ITS<-t(vst.blind.Mat.ITS)
vst.blind.Mat.ITS[which(vst.blind.Mat.ITS<0)]<-0


# Compute Bray-Curtis dissimilarities
comm.vst.blind.Mat.ITS <- vegdist(vst.blind.Mat.ITS, "bray")


# PERMANOVA
permanova_ITS <- adonis2(comm.vst.blind.Mat.ITS ~ Site + Layer + Treatment + 
                           Site:Layer + Site:Treatment + Layer:Treatment + Site:Layer:Treatment,
                         data=Data_soil, permutations = 999)


### END OF THE SCRIPT ###
