# Supplementary material
Source: MDPI journal article supplement (https://www.mdpi.com/1999-4907/14/6/1124)
Supplement: s1 [file s1 › Supplementary-File-2_Renaudin.txt]

Sample_ID	Site	Site_Used_Name	Unit	Treatment	Layer
C01NF	Lac_Clair	Sugar_maple_site	C01	HighN	F
C01NH	Lac_Clair	Sugar_maple_site	C01	HighN	H
C01NL16	Lac_Clair	Sugar_maple_site	C01	HighN	L
C02TF	Lac_Clair	Sugar_maple_site	C02	Control	F
C02TH	Lac_Clair	Sugar_maple_site	C02	Control	H
C02TL16	Lac_Clair	Sugar_maple_site	C02	Control	L
C03TF	Lac_Clair	Sugar_maple_site	C03	Control	F
C03TH	Lac_Clair	Sugar_maple_site	C03	Control	H
C03TL16	Lac_Clair	Sugar_maple_site	C03	Control	L
C04nF	Lac_Clair	Sugar_maple_site	C04	LowN	F
C04nH	Lac_Clair	Sugar_maple_site	C04	LowN	H
C04nL16	Lac_Clair	Sugar_maple_site	C04	LowN	L
C06NF	Lac_Clair	Sugar_maple_site	C06	HighN	F
C06NH	Lac_Clair	Sugar_maple_site	C06	HighN	H
C06NL16	Lac_Clair	Sugar_maple_site	C06	HighN	L
C08nF	Lac_Clair	Sugar_maple_site	C08	LowN	F
C08nH	Lac_Clair	Sugar_maple_site	C08	LowN	H
C08nL16	Lac_Clair	Sugar_maple_site	C08	LowN	L
C09NF	Lac_Clair	Sugar_maple_site	C09	HighN	F
C09NH	Lac_Clair	Sugar_maple_site	C09	HighN	H
C09NL16	Lac_Clair	Sugar_maple_site	C09	HighN	L
C11TF	Lac_Clair	Sugar_maple_site	C11	Control	F
C11TH	Lac_Clair	Sugar_maple_site	C11	Control	H
C11TL16	Lac_Clair	Sugar_maple_site	C11	Control	L
C12nF	Lac_Clair	Sugar_maple_site	C12	LowN	F
C12nH	Lac_Clair	Sugar_maple_site	C12	LowN	H
C12nL16	Lac_Clair	Sugar_maple_site	C12	LowN	L
L01NF	Lac_Laflamme	Balsam_fir_site	L01	HighN	F
L01NH	Lac_Laflamme	Balsam_fir_site	L01	HighN	H
L01NL	Lac_Laflamme	Balsam_fir_site	L01	HighN	L
L02nF	Lac_Laflamme	Balsam_fir_site	L02	LowN	F
L02nH	Lac_Laflamme	Balsam_fir_site	L02	LowN	H
L02nL	Lac_Laflamme	Balsam_fir_site	L02	LowN	L
L03TF	Lac_Laflamme	Balsam_fir_site	L03	Control	F
L03TH	Lac_Laflamme	Balsam_fir_site	L03	Control	H
L03TL	Lac_Laflamme	Balsam_fir_site	L03	Control	L
L04TF	Lac_Laflamme	Balsam_fir_site	L04	Control	F
L04TH	Lac_Laflamme	Balsam_fir_site	L04	Control	H
L04TL	Lac_Laflamme	Balsam_fir_site	L04	Control	L
L05nF	Lac_Laflamme	Balsam_fir_site	L05	LowN	F
L05nH	Lac_Laflamme	Balsam_fir_site	L05	LowN	H
L05nL	Lac_Laflamme	Balsam_fir_site	L05	LowN	L
L07NF	Lac_Laflamme	Balsam_fir_site	L07	HighN	F
L07NH	Lac_Laflamme	Balsam_fir_site	L07	HighN	H
L07NL	Lac_Laflamme	Balsam_fir_site	L07	HighN	L
L08NF	Lac_Laflamme	Balsam_fir_site	L08	HighN	F
L08NH	Lac_Laflamme	Balsam_fir_site	L08	HighN	H
L08NL	Lac_Laflamme	Balsam_fir_site	L08	HighN	L
L09nF	Lac_Laflamme	Balsam_fir_site	L09	LowN	F
L09nH	Lac_Laflamme	Balsam_fir_site	L09	LowN	H
L09nL	Lac_Laflamme	Balsam_fir_site	L09	LowN	L
L12TF	Lac_Laflamme	Balsam_fir_site	L12	Control	F
L12TH	Lac_Laflamme	Balsam_fir_site	L12	Control	H
L12TL	Lac_Laflamme	Balsam_fir_site	L12	Control	L
T02F	Lac_Tirasse	Black_spruce_site	T02	HighN	F
T02H	Lac_Tirasse	Black_spruce_site	T02	HighN	H
T03F	Lac_Tirasse	Black_spruce_site	T03	Control	F
T03H	Lac_Tirasse	Black_spruce_site	T03	Control	H
T03M	Lac_Tirasse	Black_spruce_site	T03	Control	L
T04F	Lac_Tirasse	Black_spruce_site	T04	LowN	F
T04H	Lac_Tirasse	Black_spruce_site	T04	LowN	H
T04M	Lac_Tirasse	Black_spruce_site	T04	LowN	L
T05F	Lac_Tirasse	Black_spruce_site	T05	LowN	F
T05H	Lac_Tirasse	Black_spruce_site	T05	LowN	H
T05M	Lac_Tirasse	Black_spruce_site	T05	LowN	L
T06F	Lac_Tirasse	Black_spruce_site	T06	Control	F
T06H	Lac_Tirasse	Black_spruce_site	T06	Control	H
T06M	Lac_Tirasse	Black_spruce_site	T06	Control	L
T07F	Lac_Tirasse	Black_spruce_site	T07	LowN	F
T07H	Lac_Tirasse	Black_spruce_site	T07	LowN	H
T07M	Lac_Tirasse	Black_spruce_site	T07	LowN	L
T08F	Lac_Tirasse	Black_spruce_site	T08	HighN	F
T08H	Lac_Tirasse	Black_spruce_site	T08	HighN	H
T11F	Lac_Tirasse	Black_spruce_site	T11	HighN	F
T11H	Lac_Tirasse	Black_spruce_site	T11	HighN	H
T12F	Lac_Tirasse	Black_spruce_site	T12	Control	F
T12H	Lac_Tirasse	Black_spruce_site	T12	Control	H
T12M	Lac_Tirasse	Black_spruce_site	T12	Control	L
