# Supplementary material
Source: MDPI journal article supplement (https://www.mdpi.com/1999-4907/14/6/1124)
Supplement: s1 [file s1 › Supplementary-File-3_Renaudin.txt]

Site_Watershed_Name	Site_Used_Name	Year	Treatment	Horizon	N_mg.g	CN	pH
Duchesnay	Sugar_maple_site	2013	Control	F	21.5	22.51	3.04
Duchesnay	Sugar_maple_site	2013	Control	F	22.1	21.58	2.97
Duchesnay	Sugar_maple_site	2013	Control	F	21.5	20.88	3.12
Duchesnay	Sugar_maple_site	2013	HighN	F	21.8	22.02	2.88
Duchesnay	Sugar_maple_site	2013	HighN	F	20.3	23.94	2.84
Duchesnay	Sugar_maple_site	2013	HighN	F	21.6	21.76	2.85
Duchesnay	Sugar_maple_site	2013	LowN	F	20.6	20	3.11
Duchesnay	Sugar_maple_site	2013	LowN	F	22.1	21.72	3.01
Duchesnay	Sugar_maple_site	2013	LowN	F	21.9	21.6	2.93
Duchesnay	Sugar_maple_site	2013	Control	H	15.7	19.87	3.2
Duchesnay	Sugar_maple_site	2013	Control	H	12.3	30.98	3.03
Duchesnay	Sugar_maple_site	2013	Control	H	12.3	19.35	3.22
Duchesnay	Sugar_maple_site	2013	HighN	H	20.5	20.63	3.5
Duchesnay	Sugar_maple_site	2013	HighN	H	13.3	20.83	3.25
Duchesnay	Sugar_maple_site	2013	HighN	H	15.6	19.29	3.34
Duchesnay	Sugar_maple_site	2013	LowN	H	13.2	18.94	3.71
Duchesnay	Sugar_maple_site	2013	LowN	H	14	19.71	3.16
Duchesnay	Sugar_maple_site	2013	LowN	H	13.1	19.47	3.41
Duchesnay	Sugar_maple_site	2021	Control	F	22	19.73	4.52
Duchesnay	Sugar_maple_site	2021	Control	F	22.8	19.87	4.48
Duchesnay	Sugar_maple_site	2021	Control	F	11.8	18.81	4.51
Duchesnay	Sugar_maple_site	2021	HighN	F	24.4	18.07	4.77
Duchesnay	Sugar_maple_site	2021	HighN	F	23.3	18.37	4.46
Duchesnay	Sugar_maple_site	2021	HighN	F	22.4	20.8	4.24
Duchesnay	Sugar_maple_site	2021	LowN	F	21.6	20.09	4.35
Duchesnay	Sugar_maple_site	2021	LowN	F	21.5	20.51	3.82
Duchesnay	Sugar_maple_site	2021	LowN	F	24	18.79	4.28
Duchesnay	Sugar_maple_site	2021	Control	H	18.1	18.4	4.78
Duchesnay	Sugar_maple_site	2021	Control	H	20.9	17.32	4.48
Duchesnay	Sugar_maple_site	2021	Control	H	4.8	18.33	4.62
Duchesnay	Sugar_maple_site	2021	HighN	H	22.3	18.39	4.92
Duchesnay	Sugar_maple_site	2021	HighN	H	18.8	18.35	4.5
Duchesnay	Sugar_maple_site	2021	HighN	H	17.8	18.99	4.41
Duchesnay	Sugar_maple_site	2021	LowN	H	12.6	18.41	4.68
Duchesnay	Sugar_maple_site	2021	LowN	H	8	20.63	4.6
Duchesnay	Sugar_maple_site	2021	LowN	H	21.7	18.39	4.38
Laflamme	Balsam_fir_site	2013	Control	F	17.1	33.90838207	3.11
Laflamme	Balsam_fir_site	2013	Control	F	18.1	31.84162063	2.91
Laflamme	Balsam_fir_site	2013	Control	F	20.3	28.62068966	3.15
Laflamme	Balsam_fir_site	2013	HighN	F	21.6	25.49382716	3.15
Laflamme	Balsam_fir_site	2013	HighN	F	22	25.87878788	2.96
Laflamme	Balsam_fir_site	2013	HighN	F	21.2	27.62578616	2.99
Laflamme	Balsam_fir_site	2013	LowN	F	19.1	30.54101222	2.85
Laflamme	Balsam_fir_site	2013	LowN	F	18.2	31.66666667	2.83
Laflamme	Balsam_fir_site	2013	LowN	F	18.6	31.42473118	3.11
Laflamme	Balsam_fir_site	2013	Control	H	15.3	35.30501089	2.65
Laflamme	Balsam_fir_site	2013	Control	H	19.3	25.75129534	3.16
Laflamme	Balsam_fir_site	2013	Control	H	18.2	22.82051282	3.24
Laflamme	Balsam_fir_site	2013	HighN	H	20.8	22.21153846	3.34
Laflamme	Balsam_fir_site	2013	HighN	H	16.8	23.33333333	3.32
Laflamme	Balsam_fir_site	2013	HighN	H	17.9	26.39664804	2.91
Laflamme	Balsam_fir_site	2013	LowN	H	16.1	30.57971014	2.94
Laflamme	Balsam_fir_site	2013	LowN	H	17.1	28.791423	3.04
Laflamme	Balsam_fir_site	2013	LowN	H	16	28.4375	3
Laflamme	Balsam_fir_site	2021	Control	F	17.3	25.14	4.08
Laflamme	Balsam_fir_site	2021	Control	F	14.1	28.65	3.94
Laflamme	Balsam_fir_site	2021	Control	F	17.1	22.57	4.17
Laflamme	Balsam_fir_site	2021	HighN	F	18	22.5	4.24
Laflamme	Balsam_fir_site	2021	HighN	F	17.6	22.39	4.09
Laflamme	Balsam_fir_site	2021	HighN	F	19.4	23.76	3.62
Laflamme	Balsam_fir_site	2021	LowN	F	15.4	28.05	4.08
Laflamme	Balsam_fir_site	2021	LowN	F	14.5	27.66	3.59
Laflamme	Balsam_fir_site	2021	LowN	F	18.1	25.41	3.72
Laflamme	Balsam_fir_site	2021	Control	H	16.5	21.82	4.14
Laflamme	Balsam_fir_site	2021	Control	H	12.4	28.06	4.18
Laflamme	Balsam_fir_site	2021	Control	H	12.6	20.16	4.07
Laflamme	Balsam_fir_site	2021	HighN	H	12.1	19.67	4.45
Laflamme	Balsam_fir_site	2021	HighN	H	16.9	19.53	4.01
Laflamme	Balsam_fir_site	2021	HighN	H	17.6	21.93	3.68
Laflamme	Balsam_fir_site	2021	LowN	H	14.8	21.62	4.49
Laflamme	Balsam_fir_site	2021	LowN	H	14.8	26.15	3.63
Laflamme	Balsam_fir_site	2021	LowN	H	12	24.58	3.61
Tirasse	Black_spruce_site	2013	Control	F	11.5	52.04347826	2.5
Tirasse	Black_spruce_site	2013	Control	F	10.2	57.87581699	2.57
Tirasse	Black_spruce_site	2013	Control	F	8.5	68.62745098	2.46
Tirasse	Black_spruce_site	2013	HighN	F	9.1	61.79487179	2.48
Tirasse	Black_spruce_site	2013	HighN	F	12	47.44444444	2.51
Tirasse	Black_spruce_site	2013	HighN	F	NA	NA	NA
Tirasse	Black_spruce_site	2013	LowN	F	9	65.98148148	2.37
Tirasse	Black_spruce_site	2013	LowN	F	9.2	62.01086957	2.46
Tirasse	Black_spruce_site	2013	LowN	F	11.1	53.70870871	2.66
Tirasse	Black_spruce_site	2013	Control	H	9.8	58.0952381	2.28
Tirasse	Black_spruce_site	2013	Control	H	9.1	50.64102564	2.37
Tirasse	Black_spruce_site	2013	Control	H	9.7	60.13745704	2.9
Tirasse	Black_spruce_site	2013	HighN	H	10.2	49.75490196	2.26
Tirasse	Black_spruce_site	2013	HighN	H	6.2	49.67741935	2.47
Tirasse	Black_spruce_site	2013	HighN	H	NA	NA	NA
Tirasse	Black_spruce_site	2013	LowN	H	8.3	64.37751004	2.24
Tirasse	Black_spruce_site	2013	LowN	H	6.9	45.65217391	2.5
Tirasse	Black_spruce_site	2013	LowN	H	11.9	49.11764706	2.35
Tirasse	Black_spruce_site	2021	Control	F	8.4	57.98	3.68
Tirasse	Black_spruce_site	2021	Control	F	9.9	49.49	3.62
Tirasse	Black_spruce_site	2021	Control	F	8.7	55.4	3.44
Tirasse	Black_spruce_site	2021	HighN	F	8.9	55.84	3.62
Tirasse	Black_spruce_site	2021	HighN	F	12.1	39.17	3.51
Tirasse	Black_spruce_site	2021	LowN	F	8.7	56.09	3.55
Tirasse	Black_spruce_site	2021	LowN	F	9.3	52.58	3.48
Tirasse	Black_spruce_site	2021	LowN	F	9.9	50.1	3.61
Tirasse	Black_spruce_site	2021	Control	H	6.9	43.33	3.29
Tirasse	Black_spruce_site	2021	Control	H	7.1	45.77	3.28
Tirasse	Black_spruce_site	2021	Control	H	7.5	30.93	3.43
Tirasse	Black_spruce_site	2021	HighN	H	8.4	44.88	3.13
Tirasse	Black_spruce_site	2021	HighN	H	8.1	40.49	3.58
Tirasse	Black_spruce_site	2021	LowN	H	6.7	53.28	3.64
Tirasse	Black_spruce_site	2021	LowN	H	7.9	47.97	2.88
Tirasse	Black_spruce_site	2021	LowN	H	8.8	43.41	3.42
